# Supplementary material for: Microwave-assisted extraction and ionic liquid-based dispersive liquid–liquid microextraction followed by HPLC for the determination of trace components in a Langdu preparation
Source: Royal Society of Chemistry journal article supplement (doi:10.1039/c6ay00656f), 2016-01-01
Supplement: c6ay00656f1.pdf [file c6ay00656f1.pdf]

**Table S1** Validation parameters of HPLC-UV method

|                              |                                                                                                                                                                                                                                |
|------------------------------|--------------------------------------------------------------------------------------------------------------------------------------------------------------------------------------------------------------------------------|
| <hr/>                        |                                                                                                                                                                                                                                |
| MAE procedure                |                                                                                                                                                                                                                                |
| <hr/>                        |                                                                                                                                                                                                                                |
| MAE solvent                  | 95% ethanol                                                                                                                                                                                                                    |
| MAE power                    | 500 W                                                                                                                                                                                                                          |
| MAE temperature              | 120 °C                                                                                                                                                                                                                         |
| MAE time                     | 5 min                                                                                                                                                                                                                          |
|                              |                                                                                                                                                                                                                                |
| IL-based DLLME procedure     |                                                                                                                                                                                                                                |
| <hr/>                        |                                                                                                                                                                                                                                |
| Type of extraction solvent   | [C <sub>6</sub> MIM][PF <sub>6</sub> ]                                                                                                                                                                                         |
| Volume of extraction solvent | 50 μL                                                                                                                                                                                                                          |
| Type of dispersion solvent   | methanol                                                                                                                                                                                                                       |
| Volume of dispersion solvent | 50 μL                                                                                                                                                                                                                          |
| Extraction time              | 2 min under vortex                                                                                                                                                                                                             |
| Centrifugation speed         | 3500 rpm                                                                                                                                                                                                                       |
| Centrifugation time          | 5 min                                                                                                                                                                                                                          |
| Salt concentration           | 0                                                                                                                                                                                                                              |
| Sample pH                    | 5.0                                                                                                                                                                                                                            |
|                              |                                                                                                                                                                                                                                |
| HPLC-UV procedure            |                                                                                                                                                                                                                                |
| <hr/>                        |                                                                                                                                                                                                                                |
| Chromatographic column       | C <sub>18</sub> column (150 mm × 4.6 mm, 5 μm)                                                                                                                                                                                 |
| Column temperature           | room temperature                                                                                                                                                                                                               |
| Mobile phase                 | methanol (solvent A) and THF: 1% HAc buffer = 1: 40, pH 3.0 (solvent B) using a gradient elution of 40% A at 0-12 min, 40-70% A at 12-18 min, 70% A at 18-25 min, and the re-equilibration time of gradient elution was 5 min. |
| Detection wavelength         | 325 nm                                                                                                                                                                                                                         |
| Flow rate                    | 1.0 mL/min                                                                                                                                                                                                                     |
| Injection volume             | 20 μL                                                                                                                                                                                                                          |
| <hr/>                        |                                                                                                                                                                                                                                |
